# Supplementary material for: Self-assembly of nanomicelles with rationally designed multifunctional building blocks for synergistic chemo-photodynamic therapy
Source: PubMed Central journal article supplement (PMC8899564; doi:10.7150/thno.68563), 2022-01-31
Supplement: thnov12p2028s1.pdf [file thnov12p2028s1.pdf]

## **Supporting Information for**

### **Self-assembly of nanomicelles with rationally designed multifunctional building blocks for synergistic chemo-photodynamic therapy**

Guidong Gong, Jiezhou Pan, Yunxiang He, Jiaojiao Shang, Xiaoling Wang, Yaoyao Zhang, Guolin Zhang, Fei Wang,\* Gang Zhao,\* and Junling Guo\*

## 1. Materials

Acetylferrocene, (*R*)-(+)-amino-2-(methoxymethyl) pyrrolidine, Pd(OAc)<sub>2</sub>, and Tph were purchased from Titan (Shang Hai, China). Coumarin 6, DIR, Hyaluronan (HA) (MW 10 kDa, 90 kDa, 80 – 150 kDa, and 180 kDa) were purchased from Dalian Meilun Biotech Co., Ltd (Dalian Chian), phosphate buffer saline (PBS) was bought from beyotime (Shanghai, China). Cell counting Kit-8 and Annexin V-FITC Apoptosis Detection Kit were purchased from Solarbio (Shanghai, China). Unless otherwise noted, materials were obtained from commercial suppliers and were used without further purification.

## 2. Instruments

Melting points were measured on a Meltemp melting point apparatus. Optical rotation was performed with the Perkin Elmer model 341 polarimeter. <sup>1</sup>H NMR spectra were recorded on Bruker AM400 NMR spectrometer, in which chemical shifts were signed in ppm from tetramethylsilane with the solvent resonance as the internal standard (CDCl<sub>3</sub>, δ = 7.26 ppm). Spectra were reported as follows: chemical shift (δ ppm), multiplicity (s = singlet, d = doublet, t = triplet, q = quartet, m = multiplet), coupling constants (Hz), integration and assignment. <sup>13</sup>C NMR spectra were collected on commercial instruments (100 MHz) with complete proton decoupling. Chemical shifts are reported in ppm from the tetramethylsilane with the solvent resonance as internal standard (CDCl<sub>3</sub>, δ = 77.0 ppm). MS spectra were recorded on a UPLC-Xevo™ TQMS system equipped with an ESI source. C, H, and N elemental determination were performed on a Euro EA 3000 elemental analyzer (Euro Vector, Italy). O<sub>2</sub> concentration was tested by JPSJ-605 Leizi Oxygen Dissolving Instrument (Titan, China). Size distribution and zeta potential were measured using Mastersizer 3000. TEM was measured with a TM-1000 Transmission Electron Microscope (Hitachi, Japan), Laser Scanning Confocal Microscopy was measured with Leica TCS SP8 Laser Scanning Confocal Microscopy (Germany). MW-RL-650 laser was supplied by Changchun Leishi Science and Technology Ltd. (China). *Ex vivo* biodistribution was measured with an IVIS spectrum small-animal

imaging system (IVIS Lumina Series III, PerkinElmer, USA). Blood concentration was measured with UPLC-Xevo™ TQ MS (Waters, USA).

### 3. FCP synthesis

**Compound C1:** acetylferrocene (10 mmol) and (*R*)-(+)-amino-2-(methoxymethyl)pyrrolidine were dissolved in dry benzene (100 mL) and were then filled in a flask equipped with a Dean-Stark apparatus. The red solution was refluxed over an oil bath for about 6 h and then carefully transferred into a Schlenk tube, with 5 Å molecular sieves (3.0 g) were introduced. The mixture was further refluxed for 6 h and then washed with n-hexane. Characterization data for:

**C1:** yield: 1.76 g (70%); m.p. 67.5-68.1 °C,  $[\alpha]_D^{20}$  -430.8 (c 1.0 in CHCl<sub>3</sub>); <sup>1</sup>H NMR (400 MHz, CDCl<sub>3</sub>, 25 °C, TMS):  $\delta$  = 4.67 [d, *J* = 1.3 Hz, 1H; H<sup>2</sup> (C<sub>5</sub>H<sub>4</sub>) ], 4.59 [d, *J* = 1.4, 1H; H<sup>5</sup> (C<sub>5</sub>H<sub>4</sub>)], 4.35 – 4.23 [m, 2H; H<sup>3</sup>, H<sup>4</sup> (C<sub>5</sub>H<sub>4</sub>)], 4.12 (s, 5H; C<sub>5</sub>H<sub>5</sub>), 3.50 (q, *J* = 7.2 Hz, 1H; CH) 3.38(s, 3H; OCH<sub>3</sub>), 3.34-3.20 (m, 2H; OCH<sub>2</sub>), 2.48 (dd, *J* = 17.1, 8.6 Hz, 1H; NCH<sub>2</sub>), 2.19 (s, 3H;CH<sub>3</sub>C=N), 2.04 (dt, *J* = 6.72 Hz, 1H; NCH<sub>2</sub>), 1.94 - 1.80 (m, 2H; CHCH<sub>2</sub>CH<sub>2</sub>), 1.77 - 1.62 ppm (m, 2H; CH<sub>2</sub>CH<sub>2</sub>CH<sub>2</sub>).

**FCP: C1** (297 mg, 1.0 mmol) was added to a methanolic (30 mL) solution containing Pd(OAc)<sub>2</sub> (224 mg, 1 mmol) and NaOAc·3H<sub>2</sub>O (140 mg, 1.0 mmol), and stirred at room temperature for 24 h. After the reaction completion, the resultant reaction mixture was dried under a high vacuum, and then the product was extracted into chloroform and passed through a SiO<sub>2</sub>-column using PE/EA (4:1) as eluent. Finally, the purified **FCP** was obtained from the eluted solution via evaporating chloroform. Characterization data for:

**FCP:** yield: 0.27g (53%); m.p. 203.3-203.9 °C,  $[\alpha]_D^{20}$  = -703.9 (c 1.0, CHCl<sub>3</sub>); <sup>1</sup>H NMR (400 MHz, CDCl<sub>3</sub>)  $\delta$  = 4.83 [s, 1H; H<sup>5</sup> (C<sub>5</sub>H<sub>3</sub>)], 4.44-4.13 [m, 14H; H<sup>5</sup> + H<sup>3</sup> (C<sub>5</sub>H<sub>3</sub>) + C<sub>5</sub>H<sub>5</sub>], 3.62 (s, 1H; CH), 3.38 (s, 12H; CH<sub>2</sub>OCH<sub>3</sub> + CH<sub>2</sub>), 2.90 (s, 2H; CH<sub>2</sub>), 2.26 (s, 6H; CCH<sub>3</sub>), 2.15-1.60 ppm (m, 14H; CH<sub>2</sub>); <sup>13</sup>C NMR (100 MHz, CDCl<sub>3</sub>, 25°C, TMS):  $\delta$  = 187.01 (C=N), 98.81 [C<sup>1</sup> (C<sub>5</sub>H<sub>3</sub>)], 85.47 [C<sup>2</sup> (C<sub>5</sub>H<sub>3</sub>)], 75.77 [C<sup>5</sup> (C<sub>5</sub>H<sub>3</sub>)], 73.76[C<sup>3</sup> (C<sub>5</sub>H<sub>3</sub>)], 70.62(C<sub>5</sub>H<sub>5</sub>),

67.40 [ $C^4$  ( $C_5H_3$ )], 65.61 ( $OCH_2$ ), 59.06 ( $NCH$ ), 56.62 ( $OCH_2$ ), 54.82( $NCH_2$ ), 26.66 ( $CH_2CH_2$ ), 22.25 ( $CH_2CH_2$ ), 15.20 ppm( $C=NCH_3$ );  $^{13}C$  NMR (101 MHz,  $CDCl_3$ )  $\delta$  186.6 ( $C=N$ ), 178.2 ( $CH_3C$ ), 85.5 [ $C^1$  ( $C_5H_3$ )], 75.7 [ $C^2$  ( $C_5H_3$ )], 75.0 [ $C^5$  ( $C_5H_3$ )], 70.6 [ $C^3$  ( $C_5H_3$ )], 67.7 ( $C_5H_5$ ), 65.5 ( $OCH_2$ ), 62.8 ( $NCH$ ), 59.0 ( $OCH_2$ ), 54.4 ( $NCH_2$ ), 26.9 ( $CH_2CH_2$ ), 24.3 ( $CCH_3$ ), 22.2 ( $CH_2CH_2$ ), 15.0 ppm ( $C=NCH_3$ ); MS (ES+): calcd for  $C_{40}H_{52}Fe_2N_4O_6Pd_2$  [ $M + Na$ ] $^+$ : 1031.0548, Found: 1031.0587. Anal. calcd for  $C_{40}H_{52}Fe_2N_4O_6Pd_2$ : C, 47.59; H, 5.19; N, 5.55. Found: C, 47.58; H, 5.14; N, 5.58.

#### 4. Scheme of synthesis, supplementary tables, and figures.

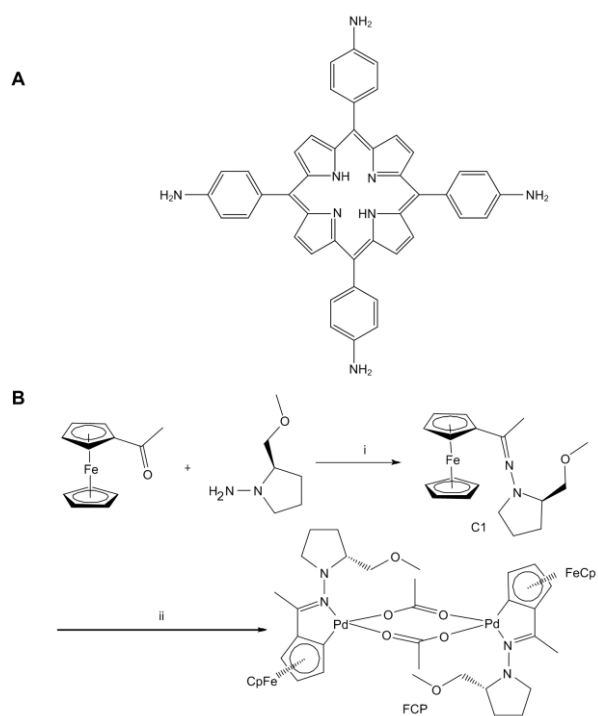

**Figure S1.** A) Structural formula of Tph. B) Overview of synthesized compounds FCP. i)

$C_6H_5CH_3$ ,  $110^\circ C$ , 24 h. ii)  $Pd(OAc)_2$ , NaOAc, MeOH, r.t., 24 h.

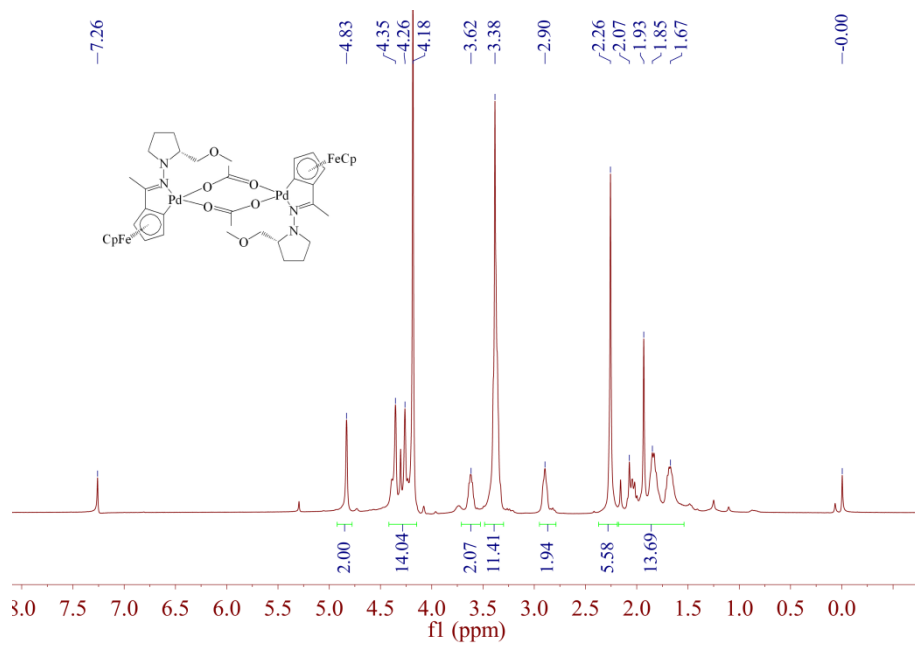

**Figure S2.**  $^1\text{H}$  NMR Spectrum of FCP (CDCl<sub>3</sub>, 400 MHz).

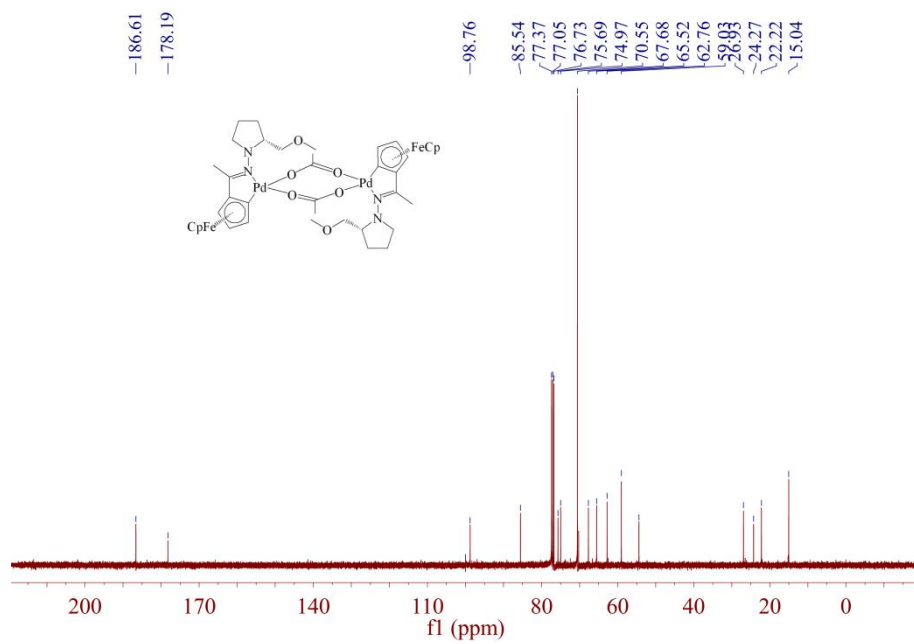

**Figure S3.**  $^1\text{H}$  NMR Spectrum of FCP ( $\text{CDCl}_3$ , 400 MHz).

**Table S1.** The average size of the nanomicelles.

| <b>Number</b> | <b>Relative molecule weight of HA (kD)</b> | <b>Feed mass ratio (HA:FCP)</b> | <b>Size (nm)<sup>a</sup></b> |
|---------------|--------------------------------------------|---------------------------------|------------------------------|
| <b>1</b>      | 10                                         | 2.9:1                           | 172.7                        |
| <b>2</b>      | 10                                         | 5.9:1                           | 197.9                        |
| <b>3</b>      | 10                                         | 11.8:1                          | 191.7                        |
| <b>4</b>      | 90                                         | 2.9:1                           | 282.1                        |
| <b>5</b>      | 90                                         | 5.9:1                           | 577.8                        |
| <b>6</b>      | 90                                         | 11.8:1                          | 627.0                        |
| <b>7</b>      | 800 ~ 1 500                                | 2.9:1                           | 950.7                        |
| <b>8</b>      | 800 ~ 1 500                                | 5.9:1                           | 1918.3                       |
| <b>9</b>      | 800 ~ 1 500                                | 11.8:1                          | 4375.7                       |
| <b>10</b>     | 1 800                                      | 2.9:1                           | 2990.0                       |
| <b>11</b>     | 1 800                                      | 5.9:1                           | 5825.3                       |
| <b>12</b>     | 1 800                                      | 11.8:1                          | 1083.3                       |

<sup>a</sup> data was obtained by DLS.



**Table S2.** The size, zeta potential, ER, and DL of nano micelles prepared with HA (10 KDa).

| Number | HA:CP                            |                 | Size (nm) <sup>a</sup> | PDI <sup>a</sup> | Zeta (mV) <sup>a</sup> | ER(%) <sup>b</sup> | DL(%) <sup>b</sup> |
|--------|----------------------------------|-----------------|------------------------|------------------|------------------------|--------------------|--------------------|
|        | Mole ratio (carboxyl in HA : CP) | Feed mass ratio |                        |                  |                        |                    |                    |
| 1      | 7:1                              | 2.9:1           | 172.7                  | 0.096            | -28.4                  | 13.78              | 46.33              |
| 2      | 14:1                             | 5.9:1           | 197.7                  | 0.053            | -34.7                  | 12.82              | 86.78              |
| 3      | 28:1                             | 11.8:1          | 191.7                  | 0.142            | -30.2                  | 7.13               | 90.63              |

<sup>a</sup> data are collected by Malvin potentiometer.

<sup>b</sup> data are collected by ICP-OES.

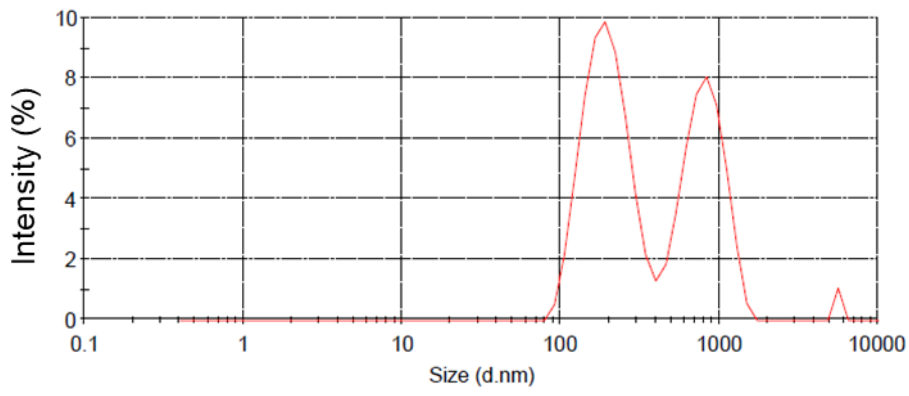

**Figure S4.** Size distribution of FCP/HA after being stimulated by HAase for 24 hours at 37 °C.

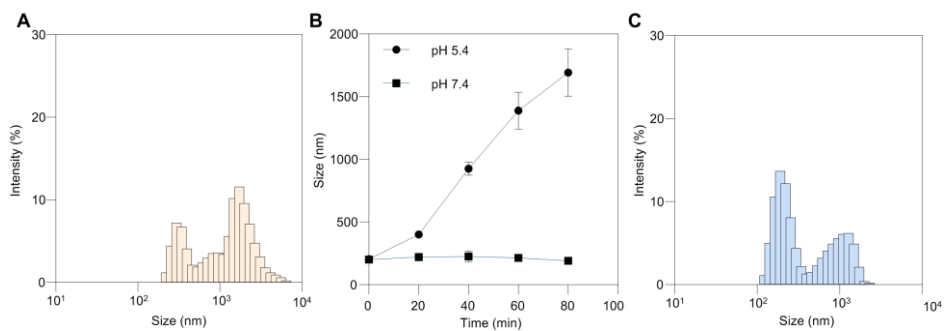

Figure S5. DLS analysis of FCP-Tph/HA. A) Size distribution of FCP-Tph/HA treated with acid (pH = 5.4) for 12 h. B) Size change of FCP-Tph/HA at different incubation time in pH = 5.4 and pH = 7.4. C) Size distribution of FCP-Tph/HA treated with GSH (5 mM) for 12 h.

**Table S3.** IC<sub>50</sub> (μg/mL) for FCP, FCP/HA, HA+CP/HA, and cisplatin against NIH 3T3, MDA-MB-231, and 4T1 cell lines.

| <b>Compounds</b> | <b>IC<sub>50</sub> (μM)</b> |                   |             |
|------------------|-----------------------------|-------------------|-------------|
|                  | <b>NIH 3T3</b>              | <b>MDA-MB-231</b> | <b>4T1</b>  |
| <b>CP</b>        | 5.41 ± 1.0                  | 1.00 ± 0.06       | 2.69 ± 0.07 |
| <b>FCP/HA</b>    | 8.92 ± 0.23                 | 3.31 ± 0.25       | 5.04 ± 0.44 |
| <b>HA+FCP/HA</b> | 8.43 ± 0.73                 | 10.4 ± 0.46       | 9.20 ± 0.14 |
| <b>Cisplatin</b> | 41.5 ± 3.3                  | 10.9 ± 0.92       | 11.4 ± 0.57 |

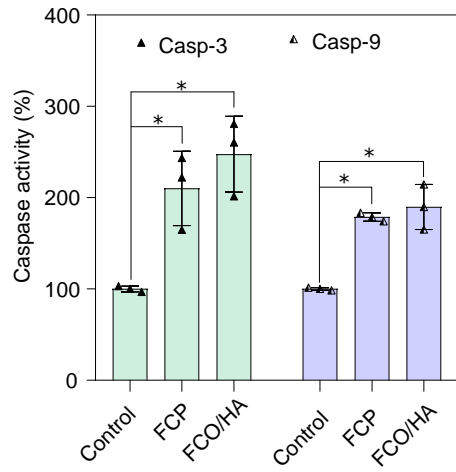

**Figure S6.** Caspase 3 and Caspase 9 activation in 4T1 cells after treatment with FCP or FCP/HA for 12 h.

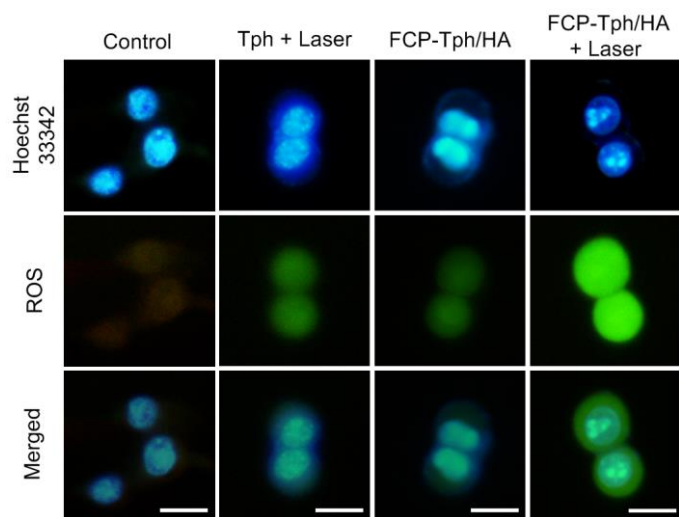

Figure S7. Representative images of intracellular ROS level after being treated with PBS (Control), Tph with laser irradiation, FCP-Tph/HA, and FCP-Tph/HA with laser irradiation. All the measured cells used in this experiment were treated under hypoxic conditions. Scale bar, 10  $\mu\text{m}$ .

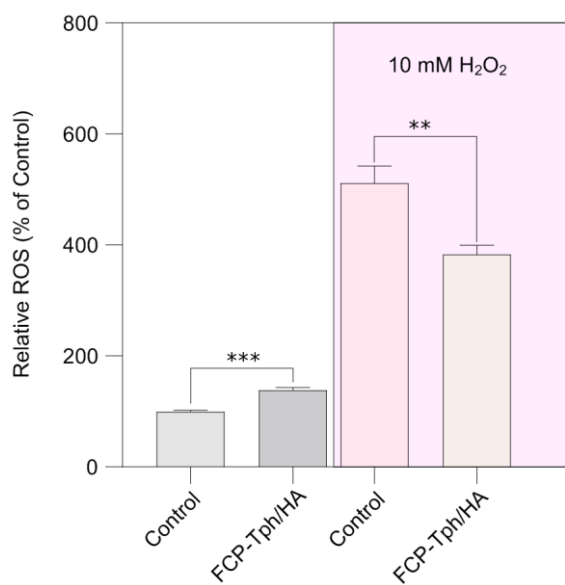

Figure S8. The relative ROS level variation of cells treated with an extra 10 mM H<sub>2</sub>O<sub>2</sub> after being treated with or without FCP-Tph/HA ([FCP] = 10 μM).

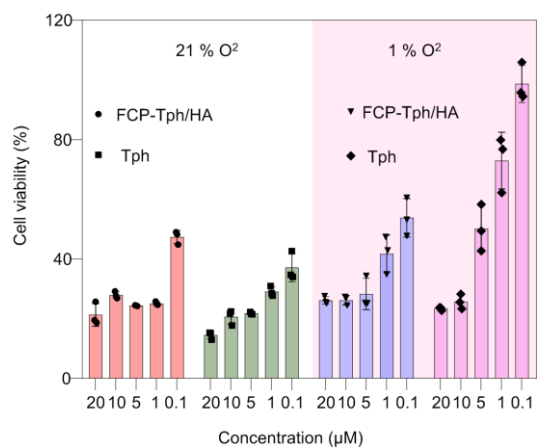

**Figure S9.** Cell viability of MDA-MB-231 cells treated with Tph or FCP-Tph/HA at different concentrations (the concentration of FCP-Tph/HA means the molar concentration of FCP and Tph in FCP-Tph/HA) for 4 hours under normoxic (21%) or hypoxic (1% O<sub>2</sub>) conditions upon 650 nm light irradiation (200 mW/cm<sup>2</sup>) for 10 min.



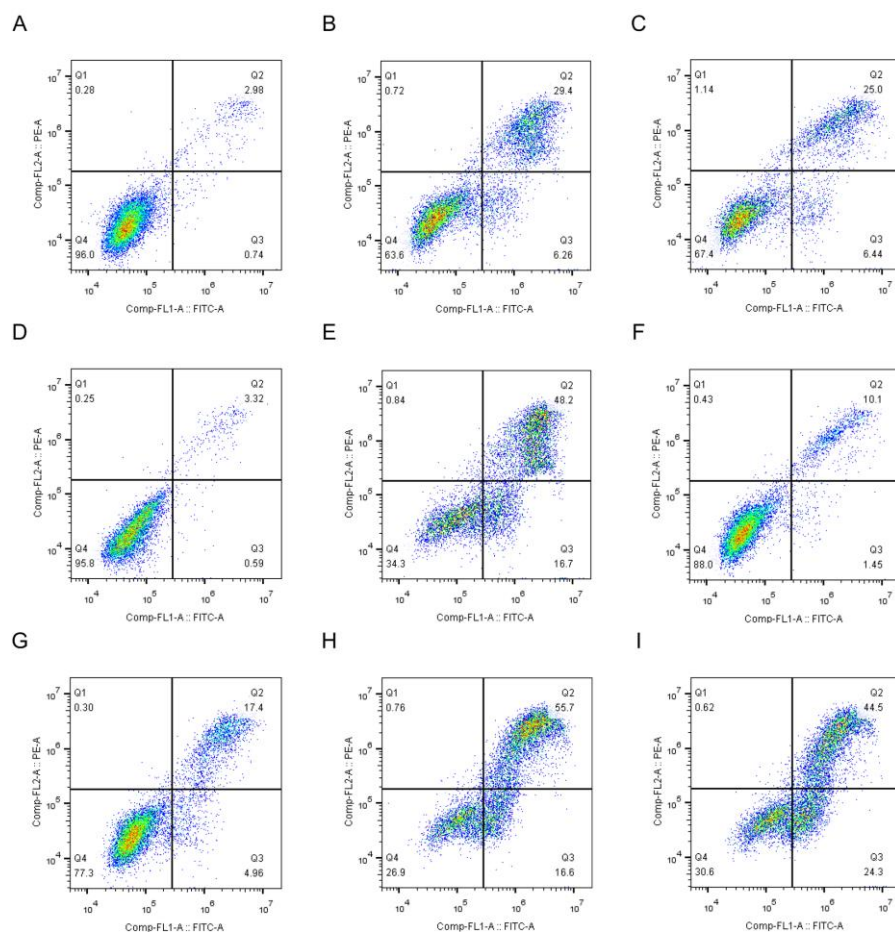

**Figure S10.** Apoptosis assay by flow cytometry; A) Control, B). FCP; C). FCP/HA; D). Tph; E). Tph + PDT; F). Tph + PDT - O<sub>2</sub> G). FCP-Tph/HA; H). FCP-Tph/HA + PDT; I) FCP-Tph/HA + PDT - O<sub>2</sub>.

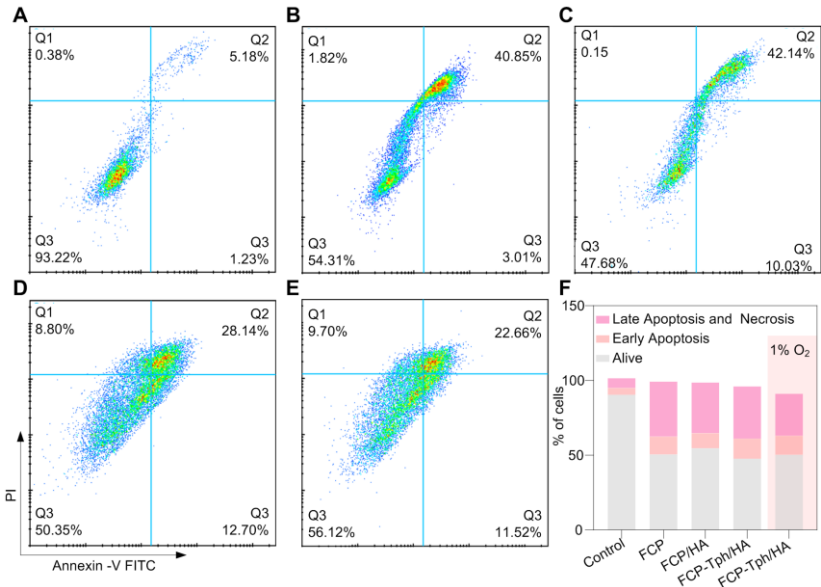

Figure S11. Apoptosis assay by flow cytometry of cells under different treatments. A) Control. B) FCP. C) FCP/HA. D) FCP-Tph/HA. E) FCP-Tph/HA – O<sub>2</sub>. F) Different percent obtained from the apoptotic study.

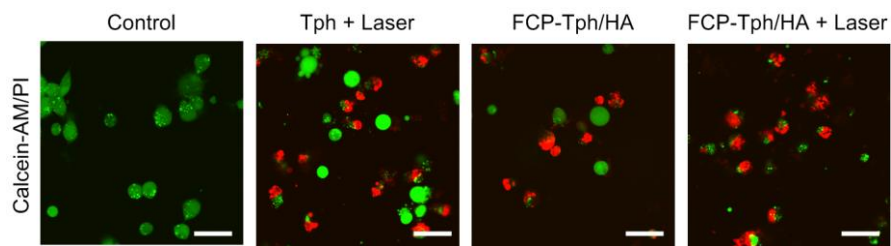

Figure S12. Representative images of 4T1 cells under hypoxia atmosphere (1% O<sub>2</sub>) and stained with Calcein-AM (green, live cells) and PI (red, dead cells). Scale bare, 20  $\mu$ m.

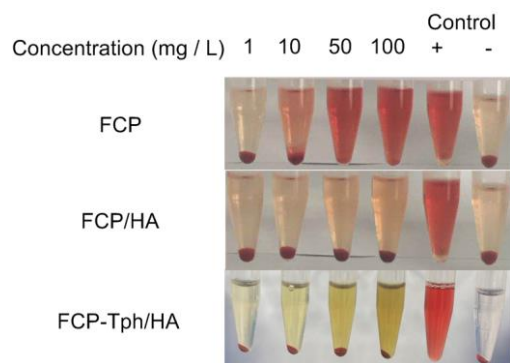

**Figure S13.** The hemolysis of RBCs after incubated with different concentrations of FCP, FCP/HA, and FCP-Tph/HA (the concentrations in the figure were indicated the concentration of FCP) for 4 hours at 37°C.

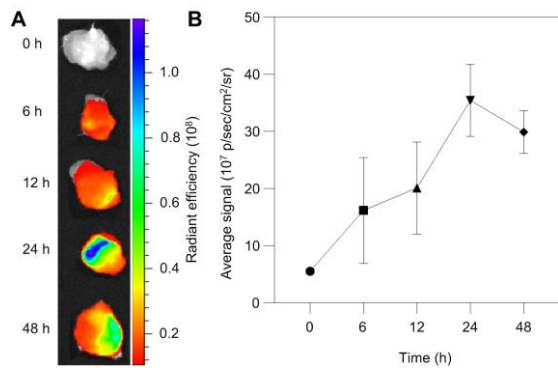

Figure S14. The accumulation of FCP-DIR/HA in the tumors over time.

**Table S4.** Pharmacokinetic results of FCP and FCP/HA. (n=6)

| <b>Formulations</b> | <b>Determined</b> | <b>T<sub>1/2</sub> / h</b> | <b>CL / mL/L/h</b> | <b>AUC<sub>0-24</sub> / nmol/mL/h</b> | <b>MRT<sub>0-24</sub> / h</b> |
|---------------------|-------------------|----------------------------|--------------------|---------------------------------------|-------------------------------|
| <b>FCP</b>          | FCP               | 3.02 ± 1.7                 | 0.85 ± 0.19        | 11.03 ± 1.9                           | 2.20 ± 1.0                    |
| <b>FCP/HA</b>       | FCP               | 17.19 ± 5.3                | 0.18 ± 0.14        | 73.38 ± 28                            | 4.43 ± 2.3                    |

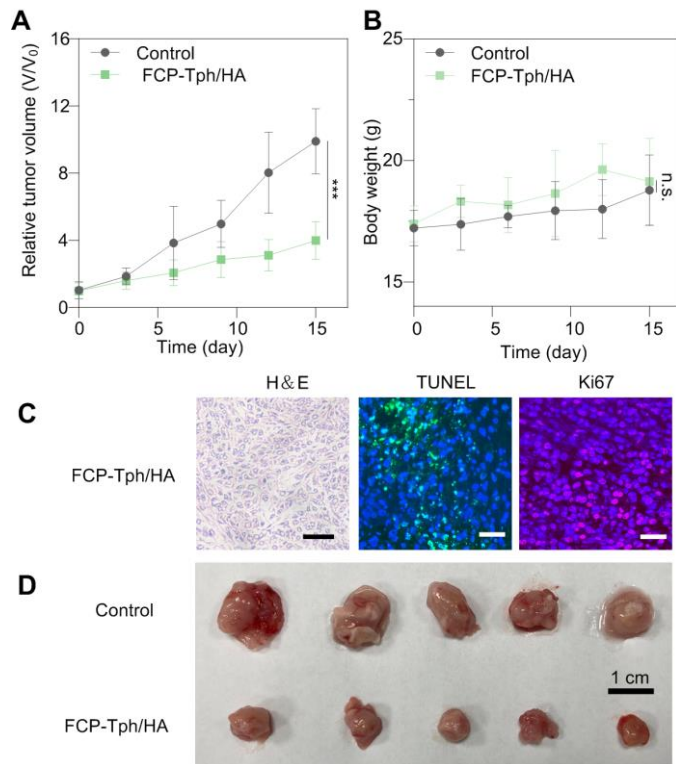

Figure S15. The antiproliferative effect of FCP-Tph/HA without 650 nm laser irradiation *in vivo*. A) Tumor growth profiles after treatment with FCP-Tph/HA. B) Plot of body weight versus time in tumor-bearing mice (n = 5). (n.s.)  $p > 0.05$ , (\*\*\*)  $p < 0.001$  compared with Control. C) Histological analysis of tumor section stained with H&E, TUNEL, and Ki67 for mice with FCP-Tph/HA treatment group. Nuclei were stained with DAPI (blue), TUNEL (green), and Ki67 (red). Scale bar, 40  $\mu\text{m}$ . D) Image of tumors after the final treatment. Scale bar, 1 cm.

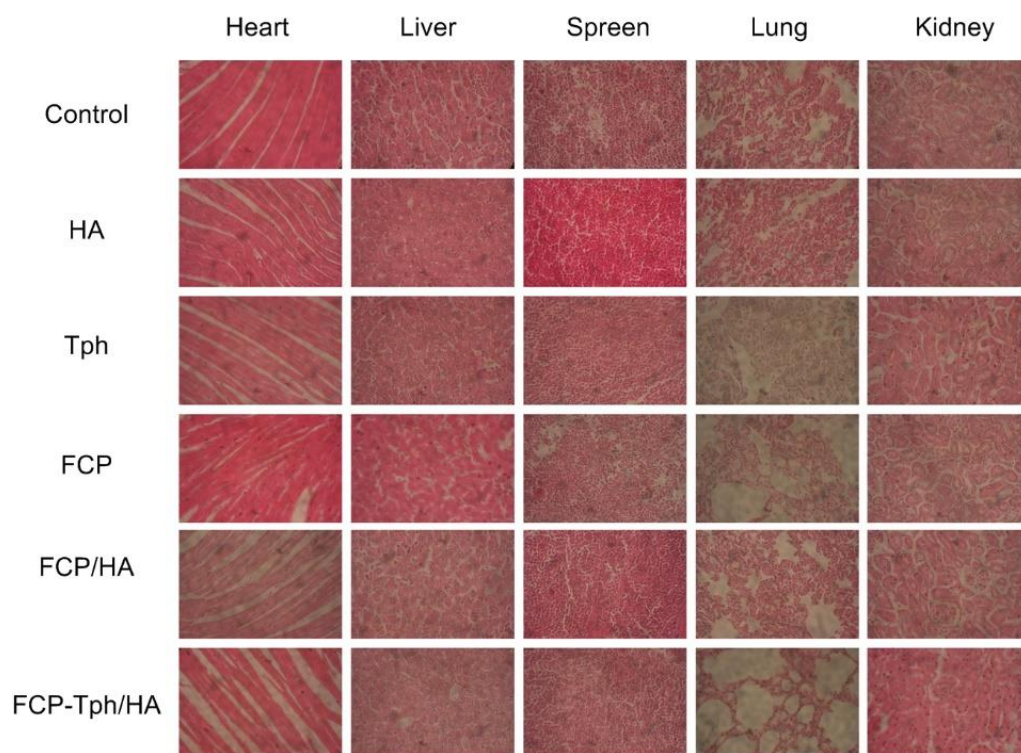

**Figure S16.** H&E staining images of heart, liver, spleen, lung, and kidney after the treatments (Nikon Ti-E microscope ( $\times 400$ )).
